# Supplementary material for: Algal polysaccharides and derivatives as potential therapeutics for obesity and related metabolic diseases
Source: Royal Society of Chemistry journal article supplement (doi:10.1039/d2fo02185d), 2022-01-01
Supplement: d2fo02185d1.pdf [file d2fo02185d1.pdf]

**Table S1. The main clinical drugs and their mode of action in the treatment of obesity.**

| Drug                       | Classification                                                             | Mechanism                                                                                                         | Side Effects                                                                                                                                                                                 |
|----------------------------|----------------------------------------------------------------------------|-------------------------------------------------------------------------------------------------------------------|----------------------------------------------------------------------------------------------------------------------------------------------------------------------------------------------|
| Amphetamine (delisted)     | Amphetamines                                                               | Releasing monoamine and inhibiting monoamine oxidase (MAO)                                                        | Cardiac valvulopathy, pulmonary hypertension, elevated blood pressure, insomnia, irritability, and depression                                                                                |
| Sibutramine (delisted)     | A serotonin and noradrenaline reuptake inhibitor                           | Promoting satiety                                                                                                 | Type 2 diabetes mellitus (T2DM) and cardiovascular disease                                                                                                                                   |
| Fenfluramine (delisted)    | 5-hydroxytryptamine receptor 2C (5HT 2C) agonist                           | Appetite suppression mediated by different serotonergic mechanisms                                                | Hallucination, cardiac valve insufficiency, and pulmonary hypertension                                                                                                                       |
| Orlistat                   | Inhibitor of pancreatic and gastric lipases                                | Inhibiting the activity of pancreatic and gastric lipases                                                         | Flatulence, oily spotting, faecal urgency, fatty/oily stool, oily defecation, increased defecation, faecal incontinence and nephrotoxicity, hepatotoxicity, nephrolithiasis and pancreatitis |
| Phentermine/topiramate     | Sympathomimetic amine anorectic                                            | Modulating by various neurotransmitters                                                                           | Teratogenicity, cardiovascular concerns as well as cognitive, psychiatric and metabolic acidosis                                                                                             |
| Lorcaserin                 | 5-hydroxytryptamine receptor 2C (5-HT 2C) agonist                          | Acting on anorexigenic POMC neurons in the hypothalamus                                                           | Headache, dizziness, fatigue, nausea, dry mouth constipation, patients with diabetes mellitus on lorcaserin include hypoglycaemia                                                            |
| Naltrexone SR/bupropion SR | Opioid receptor antagonist, dopamine and norepinephrine reuptake inhibitor | Blocks opioid receptor-mediated POMC auto-inhibition, selectively inhibits reuptake of dopamine and noradrenaline | Nausea, headache, constipation, insomnia anxiety, sleep disorder and depressed mood                                                                                                          |
| Liraglutide                | Glucagon-like peptide 1 (GLP1) receptor agonist                            | Prevents the normal activation of the NPY/AgRP system, mediating the effects of GLP-1 receptor stimulation        | Nausea, diarrhoea, constipation, vomiting, dyspepsia, abdominal pain, acute gallbladder disease, acute pancreatitis, and risk of severe hypoglycemia                                         |

**Table S2. Classification and characteristic of algal polysaccharides**

|             | Polysaccharide                               | Category                                        | Source                                                                                                                                                                                                 | Chemical structure                                                                                                                         | Molecular weight   | extraction method                                                                                                                                                 |
|-------------|----------------------------------------------|-------------------------------------------------|--------------------------------------------------------------------------------------------------------------------------------------------------------------------------------------------------------|--------------------------------------------------------------------------------------------------------------------------------------------|--------------------|-------------------------------------------------------------------------------------------------------------------------------------------------------------------|
| Brown Algae | Alginate                                     | More than 200 different alginates               | Brown algae ( <i>Phaeo-phyceae</i> ), including <i>Laminaria hyperborea</i> , <i>Laminaria digitata</i> , <i>Laminaria japonica</i> , <i>Ascophyllum nodosum</i> , and <i>Macrocystis pyrifera</i>     | Composed of (1→4)-linked β-D-mannuronate and α-L-guluronate residues                                                                       | 20 to 350 kDa      | Grinding, precipitation in a mild acid medium, ultrafiltration, and dialysis                                                                                      |
|             | Laminaran                                    | /                                               | Algae (such as <i>giant kelp</i> , <i>seaweed</i> , <i>silquosa</i> , <i>fucus</i> and <i>sargasso</i> ) and bacteria (two gram-negative bacterial genera, <i>Azotobacter</i> and <i>Pseudomonas</i> ) | Composed of β (1→3)-linked glucose units with β (1→6)-branches                                                                             | 5 kDa              | Alkaline extraction                                                                                                                                               |
|             | Fucoidan                                     | F-fucadoin and U-fucoidan                       | The brown algae's cell walls, intercellular gaps, produced mucus of marine invertebrates                                                                                                               | (1→3)-α- L-fucose or alternating (1→3)-α- L-fucose and (1→4)-α- L-fucose                                                                   | 7 to 2300 kDa      | Hot water extraction, acid extraction and alkaline extraction, ultrasonic extraction method, microwave extraction method                                          |
| Green Algae | Ulvan                                        | Ulvan A, B and its derivatives / intermediates  | The cell walls of green algae of the genus <i>Ulva</i>                                                                                                                                                 | (1→4)-β-glucuronic acid, (1→3,4)-α-L-rhamnose-3-sulphate and (1→4)-α-xylose                                                                | from 1 to 2000 kDa | Hot water extraction, acid extraction                                                                                                                             |
|             | Rhamnan sulfate                              | /                                               | The cell wall of <i>Monostroma nitidum</i>                                                                                                                                                             | Long linear chain structures of α-1,3-linked l-rhamnose connected with α-1,2-linked branched chains                                        | >30 kDa            | Hot water extraction                                                                                                                                              |
| Red Algae   | Agar                                         | /                                               | The cell walls of <i>Gelidium</i> , <i>Gracilaria</i> , and <i>Gelidiella</i>                                                                                                                          | Alternating 1,3-linked β-D-galactopyranose and 1,4-linked 3,6-anhydro-α-L-galactopyranose                                                  | ~120 kDa           | Hot water extraction, alkaline extraction                                                                                                                         |
|             | Carrageenan                                  | ι-carrageenan, κ- carrageenan and λ-carrageenan | Exists in seaweed or algae ( <i>Chondrus</i> , <i>Euheuma</i> , <i>Gigartina</i> , <i>Euheuma</i> and <i>Rhodophyceae</i> )                                                                            | Made up of several repeating units of α-D-galactopyranose linked 1→3 residue and β-D-galactopyranose residues linked through positions 1,4 | 453 to 652 kDa     | Alkaline extraction                                                                                                                                               |
| Spirulina   | Polysaccharide of <i>Spirulina platensis</i> | /                                               | <i>Spirulina platensis</i>                                                                                                                                                                             | A backbone of β (1→3) and β (1→6) linked chains and short branches of β (1→2) are attached to the main chain                               | > 160kDa           | Water extraction method, alcohol precipitation method, acid-base extraction method, ultrasonic extraction method, freeze-thaw method, enzymatic hydrolysis method |
| ↑,          | increased;                                   |                                                 | ↓,                                                                                                                                                                                                     | decreased;                                                                                                                                 | /,                 | not mentioned                                                                                                                                                     |
